# Supplementary material for: Low-Temperature Multiple Micro-Dispensing on Microneedles for Accurate Transcutaneous Smallpox Vaccination
Source: Vaccines (Basel). 2022 Apr 4;10(4):561. doi: 10.3390/vaccines10040561 (PMC9024753; doi:10.3390/vaccines10040561)
Supplement: Supplementary file 1 [file vaccines-10-00561-s001.zip › vaccines-1637809-supplementary.pdf]

## Supplementary materials

### Low-temperature multiple micro-dispensing on microneedles for accurate transcutaneous smallpox vaccination

Sang-Gu Yim <sup>1,†</sup>, Yun-Ho Hwang <sup>2,†</sup>, Seonyeong An <sup>1</sup>, Keum-Yong Seong <sup>1</sup>, Seo Yeon Kim <sup>2</sup>, Semin Kim <sup>3</sup>, Hyeseon Lee <sup>1</sup>, Kang-Oh Lee <sup>3</sup>, Mi Young Kim <sup>2</sup>, Dokeun Kim <sup>2</sup>, You-Jin Kim <sup>2,\*</sup> and Seung Yun Yang <sup>1,\*</sup>

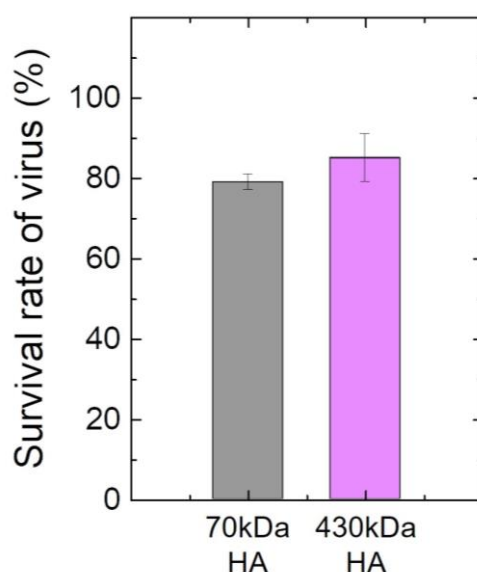

**Figure S1.** Effect of the MW of HA used as a viscous enhancer on the activity of smallpox vaccine (vaccinia virus) in coating solutions.

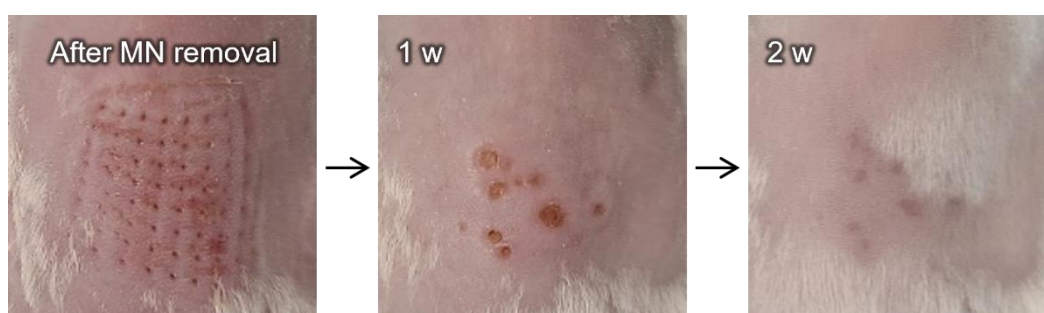

**Figure S2.** Photographs showing the cutaneous reaction at the inoculation site with vaccinia virus-coated MN patch.

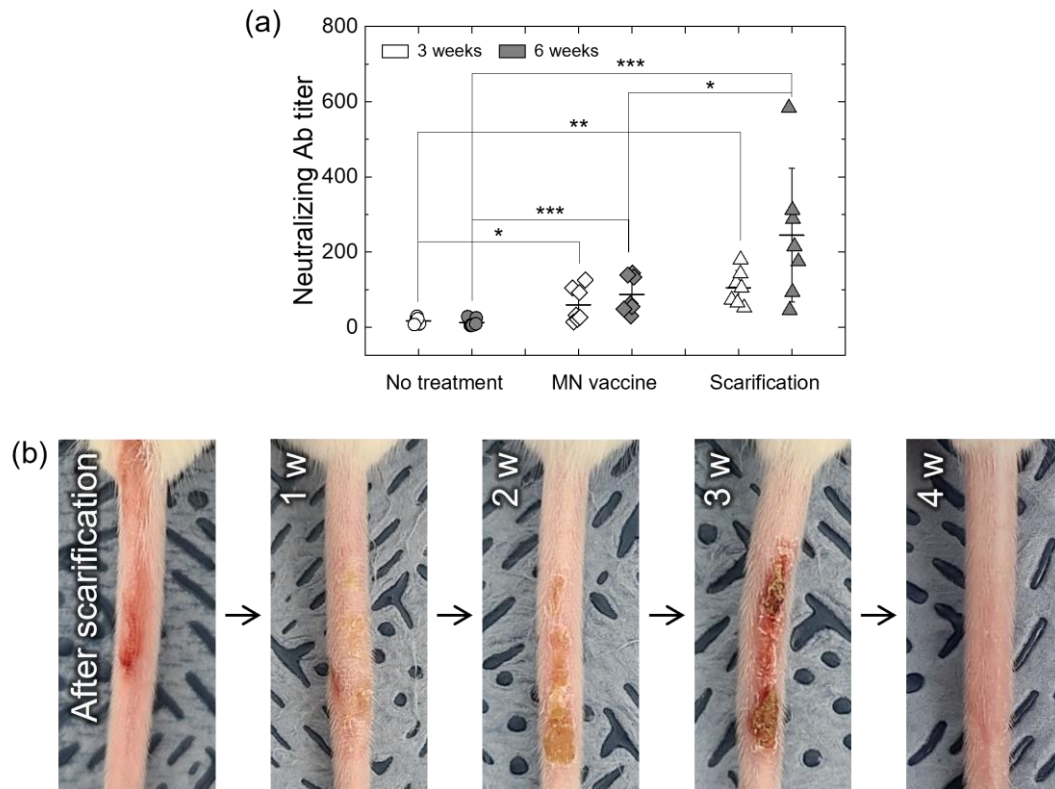

**Figure S3.** (a) Neutralizing antibody titers at 3 and 6 weeks after immunization with smallpox vaccine ( $2 \times 10^5$  PFU) using tail scarification technique. For immunization, female BALB/C mice were vaccinated by applying a droplet of 20  $\mu$ L of vaccine solution on the dorsal base of the tail followed by scratching the skin with an 18G needle. Serum samples of mice were collected at 3 and 6 weeks after vaccination (n=7). (b) Photographs showing the cutaneous reaction at the vaccination site inoculated by scarification. Notably, a more severe cutaneous reaction was observed after inoculation by scarification, and the scar remained at 4 weeks. Statistical significance compared to the no treatment sample was determined by a t-test (\*p < 0.05, \*\*p < 0.01, \*\*\*p < 0.005).
